# Supplementary material for: Exploration of the metabolomic mechanisms of postmenopausal hypertension induced by low estrogen state
Source: eLife. 2025 Jan 16;13:RP101701. doi: 10.7554/eLife.101701 (PMC11737871; doi:10.7554/eLife.101701)
Supplement: Supplementary file 4. [file elife-101701-supp4.xlsx]

## Sheet: venn_partitions
One-way ANOVA & post-hoc Tests	Non-parametric version (Kruskal Wallis Test)	..set..	..values..	..count..
TRUE	TRUE	One-way ANOVA & post-hoc Tests∩Non-parametric version (Kruskal Wallis Test)	L-Alpha-aminobutyric acid, Methylpicraquassioside A, Pyroglutamine, D-Ribose 5-phosphate, L-Erythrulose, 4-Guanidinobutanoic acid, 4-Hydroxybutyric acid, Inosinic acid, 4-Hydroxyproline, Phosphorylcholine, Uridine, Uracil, 3-Phosphoglyceric acid, Proline betaine, O-dodecanoylcarnitine	15
FALSE	TRUE	(Non-parametric version (Kruskal Wallis Test))∖(One-way ANOVA & post-hoc Tests)	O-decanoyl-L-carnitine, C17-carnitine	2
TRUE	FALSE	(One-way ANOVA & post-hoc Tests)∖(Non-parametric version (Kruskal Wallis Test))	Phosphoenolpyruvic acid, Cholic acid, 6-Phosphonoglucono-D-lactone, Theobromine, Glycerophosphocholine, Indoxyl sulfate, Betaine, LysoPE(18:2)	8
