# Supplementary material for: Exploration of the metabolomic mechanisms of postmenopausal hypertension induced by low estrogen state
Source: eLife. 2025 Jan 16;13:RP101701. doi: 10.7554/eLife.101701 (PMC11737871; doi:10.7554/eLife.101701)
Supplement: Supplementary file 10. [file elife-101701-supp10.xlsx]

## Sheet: Sheet1
PLS-DA cross validation details:
Measure	1 comps	2 comps	3 comps	4 comps	5 comps
Accuracy	0.54667	0.84333	0.89333	1	1
R2	0.64174	0.83872	0.95092	0.97482	0.99013
Q2	0.24844	0.3744	0.51925	0.54428	0.6013
