# Supplementary material for: Exploration of the metabolomic mechanisms of postmenopausal hypertension induced by low estrogen state
Source: eLife. 2025 Jan 16;13:RP101701. doi: 10.7554/eLife.101701 (PMC11737871; doi:10.7554/eLife.101701)
Supplement: Supplementary file 27. [file elife-101701-supp27.xlsx]

## Sheet: Sheet1
Name	AUC	T-tests	Log2 FC
O-decanoyl-L-carnitine	1	0.0011681	1.2901
4-Hydroxyproline	1	2.2096e-05	1.094
L-Alpha-aminobutyric acid	1	6.1865e-05	-1.1308
Methylpicraquassioside A	1	3.8163e-05	-0.33906
O-dodecanoylcarnitine	0.98438	3.4839e-05	1.4496
4-Hydroxybutyric acid	0.98438	0.00097359	1.6357
D-Ribose 5-phosphate	0.96875	0.00010056	-0.2957
L-Lactic acid	0.95312	0.0038964	0.6798
Uracil	0.95312	0.0025968	-0.88821
L-Hexanoylcarnitine	0.9375	0.00046384	1.3993
Ribothymidine	0.9375	0.042389	-1.0715
Butyrylcarnitine	0.92188	0.0012024	1.2163
3-Phosphoglyceric acid	0.92188	0.006142	-0.31556
Phosphorylcholine	0.92188	0.0028183	-0.39807
Phosphoenolpyruvic acid	0.92188	0.00079156	-0.62451
Uridine	0.92188	0.0029409	-0.93112
Tetradecanoylcarnitine	0.90625	0.0089953	0.77213
Cysteinylglycine	0.90625	0.041743	1.1729
6-Phosphonoglucono-D-lactone	0.90625	0.0010115	-0.66385
Adenylsuccinic acid	0.90625	0.0050946	1.9003
Cytidine	0.90625	0.0044599	-0.37297
Betaine	0.89062	0.0045114	0.6209
Allopurinol	0.89062	0.015409	-0.20296
Hypoxanthine	0.89062	0.0051841	-0.17649
D-Erythrose 4-phosphate	0.875	0.0038905	-0.26169
Inosinic acid	0.875	0.0049678	0.9394
sn-1 LysoPC(16:0)	0.85938	0.014156	-0.30592
LysoPE(18:1)	0.85938	0.011983	-0.21767
LysoPE(18:2)	0.85938	0.0071675	-0.29691
Cytosine	0.85938	0.0050067	-0.15376
L-Tryptophan	0.84375	0.26383	0.29989
Serylvaline.1	0.84375	0.15696	-0.40917
Succinic acid	0.82812	0.055845	0.43398
2-Hydroxy-2-methylbutyric acid	0.82812	0.013363	0.69727
Guanosine monophosphate	0.82812	0.019508	1.2794
sn-1 LysoPC(18:0)	0.82812	0.024085	-0.18525
1-Methylguanine	0.82812	0.032509	1.3298
Theobromine	0.82812	0.01695	-0.1271
D-Glucose	0.8125	0.049488	-0.042426
D-Maltose	0.8125	0.22729	0.073422
2-Hydroxycaproic acid	0.8125	0.035442	0.89628
L-Kynurenine	0.8125	0.02014	-0.72749
Adenosine monophosphate	0.8125	0.036121	0.9867
Guanine	0.8125	0.13378	-0.54295
Acetylcholine	0.8125	0.021265	0.58732
4-Guanidinobutanoic acid	0.79688	0.018458	-0.70344
L-Lysine	0.79688	0.037692	-0.22479
L-Proline	0.79688	0.39166	0.23335
Hippuric acid	0.79688	0.090215	-0.2886
Cholic acid	0.79688	0.0070059	1.5951
LysoPE(20:4)	0.79688	0.066753	-0.097272
C17-carnitine	0.78125	0.091174	2.933
L-Tyrosine	0.78125	0.30713	0.26901
Oxidized glutathione	0.78125	0.051275	0.42461
L-Erythrulose	0.78125	0.027121	-0.70774
Isocitric acid	0.78125	0.049563	0.46187
Guanosine	0.78125	0.15983	-0.5776
Inosine	0.78125	0.037313	-0.052307
Adenosine 3'-monophosphate	0.78125	0.037633	1.4493
Mandelic acid	0.76562	0.033343	-0.50826
sn-1 LysoPC(18:2)	0.76562	0.040479	-0.15695
adenine	0.76562	0.085552	-0.15501
Xanthine	0.76562	0.056308	-0.34788
Cytidine monophosphate	0.76562	0.055965	0.98347
C17-carnitine.1	0.76562	0.056173	0.77608
Phosphocreatine	0.75	0.093938	-0.36391
Pyroglutamic acid	0.75	0.13176	0.35442
Coumarin	0.75	0.3209	0.27754
LysoPC(20:4(5Z,8Z,11Z,14Z))	0.75	0.062909	-0.14764
Alpha-ketoisovaleric acid	0.75	0.12942	-0.019404
Pseudouridine	0.75	0.10134	-0.30862
Uric acid	0.75	0.29337	0.32078
Gamma-Glutamyltyrosine	0.73438	0.17043	-0.35306
L-Valine	0.73438	0.54843	0.21571
Sarcosine	0.73438	0.098718	0.5758
Maltotriose	0.73438	0.03326	-0.57046
Hydroxyphenyllactic acid	0.73438	0.18261	0.51133
Tiglylcarnitine	0.71875	0.21852	-0.32047
Urea	0.71875	0.10829	0.70214
Oxypurinol	0.71875	0.057451	-0.28186
8-Oxo-dGMP	0.71875	0.15928	0.68204
Creatinine	0.70312	0.4597	0.082321
Homocysteine	0.70312	0.51741	0.056796
Methionyl-Phenylalanine	0.70312	0.11689	0.81638
Gluconic acid	0.70312	0.1418	-0.32193
cis-Aconitic acid	0.70312	0.08765	0.74438
Serylleucine.1	0.70312	0.21124	-0.1066
Hydroxyvalerylcarnitine	0.6875	0.18946	0.40058
Glutathione	0.6875	0.18406	0.78319
L-Histidine	0.6875	0.35792	0.34804
Serylvaline	0.6875	0.17983	-0.11341
Glycerophosphocholine	0.6875	0.21443	0.036024
4-Pyridoxic acid	0.6875	0.21613	-0.18381
sn-2 LysoPC(16:0)	0.6875	0.24907	0.5089
sn-2 LysoPC(18:2)	0.6875	0.25115	-0.0020431
Hydroxyhexanoycarnitine	0.67188	0.13174	0.4309
L-gamma-glutamyl-L-leucine	0.67188	0.18513	0.47599
L-gamma-glutamyl-L-valine	0.67188	0.25226	0.39175
L-Leucine	0.67188	0.89138	-0.040433
Proline betaine	0.67188	0.23884	0.70574
D-Sedoheptulose 7-phosphate	0.67188	0.22057	-0.31459
Glucose 6-phosphate	0.67188	0.15344	-0.17187
Tridecanoic acid	0.67188	0.10577	0.92927
Allantoin	0.67188	0.23577	0.45603
Ketoleucine	0.67188	0.19246	-0.010434
L-Acetylcarnitine	0.65625	0.34805	0.33228
L-Octanoylcarnitine	0.65625	0.4774	0.07198
(S)-Homostachydrine	0.65625	0.22055	0.88773
Citrulline	0.65625	0.23368	0.39612
L-Alanine	0.65625	0.18523	0.49517
L-Methionine	0.65625	0.31517	1.0603
L-Phenylalanine	0.65625	0.71979	0.055141
N-a-Acetyl-L-arginine	0.65625	0.5388	0.26387
5'-Methylthioadenosine	0.65625	0.30112	1.0513
cortisol	0.65625	0.46798	6.5311
Isoleucyl-Alanine	0.64062	0.12541	0.77188
Phenylalanyl-Glutamate	0.64062	0.40847	0.068848
Phenylalanyl-Tyrosine	0.64062	0.33282	0.59163
Citric acid	0.64062	0.14564	0.53474
Urocanic acid	0.64062	0.13909	0.74166
Choline	0.64062	0.16461	0.034231
N6-Acetyl-L-lysine	0.625	0.21776	-0.16777
Ornithine	0.625	0.41823	0.29407
S-Lactoylglutathione	0.625	0.31725	1.6049
Taurine	0.625	0.10317	0.56696
2-Hydroxyglutarate	0.625	0.34459	-0.11695
Acetaminophen	0.625	0.4393	-0.036988
Pantothenic acid	0.60938	0.29945	-0.012293
Creatine	0.60938	0.42719	0.30596
L-Isoleucine	0.60938	0.96005	-0.057416
Pipecolic acid	0.60938	0.2744	-0.24278
Serylisoleucine	0.60938	0.39116	-0.079076
Serylleucine	0.60938	0.20096	0.3758
L-Malic acid	0.60938	0.41463	0.062139
Indoxyl sulfate	0.60938	0.30418	-0.16975
ADP	0.60938	0.69744	0.0997
2-Hydroxypyridine	0.60938	0.27989	-0.02314
Niacinamide	0.60938	0.2253	0.050091
L-Carnitine	0.60938	0.29544	0.093159
sn-2 LysoPC(18:0)	0.60938	0.59399	0.32141
Isobutyryl-L-carnitine	0.59375	0.43749	0.27962
3-Hydroxyisovalerylcarnitine	0.59375	0.48444	0.29883
2-Hydroxybutyric acid	0.59375	0.57549	0.057131
5-Hydroxy-L-tryptophan	0.59375	0.4394	0.10088
N-acetyltryptophan	0.59375	0.38952	-0.1273
Pyroglutamine	0.59375	0.40404	0.40064
Threoninyl-Leucine	0.59375	0.55916	0.13456
6-Phosphogluconic acid	0.59375	0.37571	0.0034818
D-Glyceraldehyde 3-phosphate	0.59375	0.6924	0.15467
Fumaric acid	0.59375	0.86953	0.20398
Riboflavin	0.59375	0.2167	-0.46791
L-Arginine	0.57812	0.73735	-0.1203
L-Glutamic acid	0.57812	0.9867	0.22325
Tyrosyl-Alanine	0.57812	0.45045	-0.17283
Fructose 1,6-bisphosphate	0.57812	0.68894	0.20933
Phenol sulphate	0.57812	0.54367	0.093276
Epinephrine	0.57812	0.41509	0.01036
Deoxyadenosine	0.57812	0.45476	0.3661
Histidinyl-Phenylalanine	0.5625	0.45228	-0.053278
Phenylalanyl-Serine	0.5625	0.46433	0.35575
1-Methylguanosine	0.5625	0.51843	-0.17098
Uridine 5'-monophosphate	0.5625	0.51196	-0.42843
Propionylcarnitine	0.54688	0.584	-0.064156
(S)-2-Azetidinecarboxylic acid	0.54688	0.80593	0.27874
Leucyl-Arginine	0.54688	0.61756	0.021456
Lysyl-Leucine	0.54688	0.76733	0.061066
N-Acetyl-L-methionine	0.54688	0.78581	0.10212
Phenylalanyl-Valine	0.54688	0.97624	0.18888
L-Threonic Acid	0.54688	0.5441	0.33242
NAD	0.54688	0.69788	0.13213
Adenosine	0.54688	0.75357	0.17724
L-Glutamine	0.53125	0.52823	0.3301
L-Threonine	0.53125	0.56394	0.29752
Symmetric dimethylarginine	0.53125	0.83775	0.13323
p-Cresol sulfate	0.53125	0.7511	-0.14527
1-Methyladenosine	0.53125	0.87028	0.21138
Xanthosine	0.53125	0.61673	-0.63225
Diethanolamine	0.51562	0.99304	0.15717
L-Aspartic acid	0.51562	0.90966	0.1878
Leucyl-Serine	0.51562	0.58548	-0.009978
L-gamma-glutamyl-L-isoleucine	0.51562	0.70612	0.31086
2-Ethylhydracrylic acid	0.51562	0.84409	0.21655
Glycerol 3-phosphate	0.51562	0.80711	0.20325
Indolelactic acid	0.51562	0.48125	-0.33242
thymine	0.51562	0.79312	0.16346
Isovalerylcarnitine	0.5	0.84494	0.2925
Valerylcarnitine	0.5	0.9169	0.33159
N-Acetyl-L-aspartic acid	0.5	0.9763	0.13499
Glycocholic acid	0.5	0.93747	-0.3516
Dihydrouracil	0.5	0.86669	0.26827

## Sheet: Sheet2
O-decanoyl-L-carnitine	1	0.0011681	1.2901
4-Hydroxyproline	1	2.2096e-05	1.094
L-Alpha-aminobutyric acid	1	6.1865e-05	-1.1308
Methylpicraquassioside A	1	3.8163e-05	-0.33906
O-dodecanoylcarnitine	0.98438	3.4839e-05	1.4496
4-Hydroxybutyric acid	0.98438	0.00097359	1.6357
D-Ribose 5-phosphate	0.96875	0.00010056	-0.2957
L-Lactic acid	0.95312	0.0038964	0.6798
Uracil	0.95312	0.0025968	-0.88821
L-Hexanoylcarnitine	0.9375	0.00046384	1.3993
Ribothymidine	0.9375	0.042389	-1.0715
Butyrylcarnitine	0.92188	0.0012024	1.2163
3-Phosphoglyceric acid	0.92188	0.006142	-0.31556
Phosphorylcholine	0.92188	0.0028183	-0.39807
Phosphoenolpyruvic acid	0.92188	0.00079156	-0.62451
Uridine	0.92188	0.0029409	-0.93112
Tetradecanoylcarnitine	0.90625	0.0089953	0.77213
Cysteinylglycine	0.90625	0.041743	1.1729
6-Phosphonoglucono-D-lactone	0.90625	0.0010115	-0.66385
Adenylsuccinic acid	0.90625	0.0050946	1.9003
Cytidine	0.90625	0.0044599	-0.37297
Betaine	0.89062	0.0045114	0.6209
Allopurinol	0.89062	0.015409	-0.20296
Hypoxanthine	0.89062	0.0051841	-0.17649
D-Erythrose 4-phosphate	0.875	0.0038905	-0.26169
Inosinic acid	0.875	0.0049678	0.9394
sn-1 LysoPC(16:0)	0.85938	0.014156	-0.30592
LysoPE(18:1)	0.85938	0.011983	-0.21767
LysoPE(18:2)	0.85938	0.0071675	-0.29691
Cytosine	0.85938	0.0050067	-0.15376
L-Tryptophan	0.84375	0.26383	0.29989
Serylvaline.1	0.84375	0.15696	-0.40917
Succinic acid	0.82812	0.055845	0.43398
2-Hydroxy-2-methylbutyric acid	0.82812	0.013363	0.69727
Guanosine monophosphate	0.82812	0.019508	1.2794
sn-1 LysoPC(18:0)	0.82812	0.024085	-0.18525
1-Methylguanine	0.82812	0.032509	1.3298
Theobromine	0.82812	0.01695	-0.1271
D-Glucose	0.8125	0.049488	-0.042426
D-Maltose	0.8125	0.22729	0.073422
2-Hydroxycaproic acid	0.8125	0.035442	0.89628
L-Kynurenine	0.8125	0.02014	-0.72749
Adenosine monophosphate	0.8125	0.036121	0.9867
Guanine	0.8125	0.13378	-0.54295
Acetylcholine	0.8125	0.021265	0.58732
4-Guanidinobutanoic acid	0.79688	0.018458	-0.70344
L-Lysine	0.79688	0.037692	-0.22479
L-Proline	0.79688	0.39166	0.23335
Hippuric acid	0.79688	0.090215	-0.2886
Cholic acid	0.79688	0.0070059	1.5951
LysoPE(20:4)	0.79688	0.066753	-0.097272
C17-carnitine	0.78125	0.091174	2.933
L-Tyrosine	0.78125	0.30713	0.26901
Oxidized glutathione	0.78125	0.051275	0.42461
L-Erythrulose	0.78125	0.027121	-0.70774
Isocitric acid	0.78125	0.049563	0.46187
Guanosine	0.78125	0.15983	-0.5776
Inosine	0.78125	0.037313	-0.052307
Adenosine 3'-monophosphate	0.78125	0.037633	1.4493
Mandelic acid	0.76562	0.033343	-0.50826
sn-1 LysoPC(18:2)	0.76562	0.040479	-0.15695
adenine	0.76562	0.085552	-0.15501
Xanthine	0.76562	0.056308	-0.34788
Cytidine monophosphate	0.76562	0.055965	0.98347
C17-carnitine.1	0.76562	0.056173	0.77608
Phosphocreatine	0.75	0.093938	-0.36391
Pyroglutamic acid	0.75	0.13176	0.35442
Coumarin	0.75	0.3209	0.27754
LysoPC(20:4(5Z,8Z,11Z,14Z))	0.75	0.062909	-0.14764
Alpha-ketoisovaleric acid	0.75	0.12942	-0.019404
Pseudouridine	0.75	0.10134	-0.30862
Uric acid	0.75	0.29337	0.32078
Gamma-Glutamyltyrosine	0.73438	0.17043	-0.35306
L-Valine	0.73438	0.54843	0.21571
Sarcosine	0.73438	0.098718	0.5758
Maltotriose	0.73438	0.03326	-0.57046
Hydroxyphenyllactic acid	0.73438	0.18261	0.51133
Tiglylcarnitine	0.71875	0.21852	-0.32047
Urea	0.71875	0.10829	0.70214
Oxypurinol	0.71875	0.057451	-0.28186
8-Oxo-dGMP	0.71875	0.15928	0.68204
Creatinine	0.70312	0.4597	0.082321
Homocysteine	0.70312	0.51741	0.056796
Methionyl-Phenylalanine	0.70312	0.11689	0.81638
Gluconic acid	0.70312	0.1418	-0.32193
cis-Aconitic acid	0.70312	0.08765	0.74438
Serylleucine.1	0.70312	0.21124	-0.1066
Hydroxyvalerylcarnitine	0.6875	0.18946	0.40058
Glutathione	0.6875	0.18406	0.78319
L-Histidine	0.6875	0.35792	0.34804
Serylvaline	0.6875	0.17983	-0.11341
Glycerophosphocholine	0.6875	0.21443	0.036024
4-Pyridoxic acid	0.6875	0.21613	-0.18381
sn-2 LysoPC(16:0)	0.6875	0.24907	0.5089
sn-2 LysoPC(18:2)	0.6875	0.25115	-0.0020431
Hydroxyhexanoycarnitine	0.67188	0.13174	0.4309
L-gamma-glutamyl-L-leucine	0.67188	0.18513	0.47599
L-gamma-glutamyl-L-valine	0.67188	0.25226	0.39175
L-Leucine	0.67188	0.89138	-0.040433
Proline betaine	0.67188	0.23884	0.70574
D-Sedoheptulose 7-phosphate	0.67188	0.22057	-0.31459
Glucose 6-phosphate	0.67188	0.15344	-0.17187
Tridecanoic acid	0.67188	0.10577	0.92927
Allantoin	0.67188	0.23577	0.45603
Ketoleucine	0.67188	0.19246	-0.010434
L-Acetylcarnitine	0.65625	0.34805	0.33228
L-Octanoylcarnitine	0.65625	0.4774	0.07198
(S)-Homostachydrine	0.65625	0.22055	0.88773
Citrulline	0.65625	0.23368	0.39612
L-Alanine	0.65625	0.18523	0.49517
L-Methionine	0.65625	0.31517	1.0603
L-Phenylalanine	0.65625	0.71979	0.055141
N-a-Acetyl-L-arginine	0.65625	0.5388	0.26387
5'-Methylthioadenosine	0.65625	0.30112	1.0513
cortisol	0.65625	0.46798	6.5311
Isoleucyl-Alanine	0.64062	0.12541	0.77188
Phenylalanyl-Glutamate	0.64062	0.40847	0.068848
Phenylalanyl-Tyrosine	0.64062	0.33282	0.59163
Citric acid	0.64062	0.14564	0.53474
Urocanic acid	0.64062	0.13909	0.74166
Choline	0.64062	0.16461	0.034231
N6-Acetyl-L-lysine	0.625	0.21776	-0.16777
Ornithine	0.625	0.41823	0.29407
S-Lactoylglutathione	0.625	0.31725	1.6049
Taurine	0.625	0.10317	0.56696
2-Hydroxyglutarate	0.625	0.34459	-0.11695
Acetaminophen	0.625	0.4393	-0.036988
Pantothenic acid	0.60938	0.29945	-0.012293
Creatine	0.60938	0.42719	0.30596
L-Isoleucine	0.60938	0.96005	-0.057416
Pipecolic acid	0.60938	0.2744	-0.24278
Serylisoleucine	0.60938	0.39116	-0.079076
Serylleucine	0.60938	0.20096	0.3758
L-Malic acid	0.60938	0.41463	0.062139
Indoxyl sulfate	0.60938	0.30418	-0.16975
ADP	0.60938	0.69744	0.0997
2-Hydroxypyridine	0.60938	0.27989	-0.02314
Niacinamide	0.60938	0.2253	0.050091
L-Carnitine	0.60938	0.29544	0.093159
sn-2 LysoPC(18:0)	0.60938	0.59399	0.32141
Isobutyryl-L-carnitine	0.59375	0.43749	0.27962
3-Hydroxyisovalerylcarnitine	0.59375	0.48444	0.29883
2-Hydroxybutyric acid	0.59375	0.57549	0.057131
5-Hydroxy-L-tryptophan	0.59375	0.4394	0.10088
N-acetyltryptophan	0.59375	0.38952	-0.1273
Pyroglutamine	0.59375	0.40404	0.40064
Threoninyl-Leucine	0.59375	0.55916	0.13456
6-Phosphogluconic acid	0.59375	0.37571	0.0034818
D-Glyceraldehyde 3-phosphate	0.59375	0.6924	0.15467
Fumaric acid	0.59375	0.86953	0.20398
Riboflavin	0.59375	0.2167	-0.46791
L-Arginine	0.57812	0.73735	-0.1203
L-Glutamic acid	0.57812	0.9867	0.22325
Tyrosyl-Alanine	0.57812	0.45045	-0.17283
Fructose 1,6-bisphosphate	0.57812	0.68894	0.20933
Phenol sulphate	0.57812	0.54367	0.093276
Epinephrine	0.57812	0.41509	0.01036
Deoxyadenosine	0.57812	0.45476	0.3661
Histidinyl-Phenylalanine	0.5625	0.45228	-0.053278
Phenylalanyl-Serine	0.5625	0.46433	0.35575
1-Methylguanosine	0.5625	0.51843	-0.17098
Uridine 5'-monophosphate	0.5625	0.51196	-0.42843
Propionylcarnitine	0.54688	0.584	-0.064156
(S)-2-Azetidinecarboxylic acid	0.54688	0.80593	0.27874
Leucyl-Arginine	0.54688	0.61756	0.021456
Lysyl-Leucine	0.54688	0.76733	0.061066
N-Acetyl-L-methionine	0.54688	0.78581	0.10212
Phenylalanyl-Valine	0.54688	0.97624	0.18888
L-Threonic Acid	0.54688	0.5441	0.33242
NAD	0.54688	0.69788	0.13213
Adenosine	0.54688	0.75357	0.17724
L-Glutamine	0.53125	0.52823	0.3301
L-Threonine	0.53125	0.56394	0.29752
Symmetric dimethylarginine	0.53125	0.83775	0.13323
p-Cresol sulfate	0.53125	0.7511	-0.14527
1-Methyladenosine	0.53125	0.87028	0.21138
Xanthosine	0.53125	0.61673	-0.63225
Diethanolamine	0.51562	0.99304	0.15717
L-Aspartic acid	0.51562	0.90966	0.1878
Leucyl-Serine	0.51562	0.58548	-0.009978
L-gamma-glutamyl-L-isoleucine	0.51562	0.70612	0.31086
2-Ethylhydracrylic acid	0.51562	0.84409	0.21655
Glycerol 3-phosphate	0.51562	0.80711	0.20325
Indolelactic acid	0.51562	0.48125	-0.33242
thymine	0.51562	0.79312	0.16346
Isovalerylcarnitine	0.5	0.84494	0.2925
Valerylcarnitine	0.5	0.9169	0.33159
N-Acetyl-L-aspartic acid	0.5	0.9763	0.13499
Glycocholic acid	0.5	0.93747	-0.3516
Dihydrouracil	0.5	0.86669	0.26827
