# Supplementary material for: Exploration of the metabolomic mechanisms of postmenopausal hypertension induced by low estrogen state
Source: eLife. 2025 Jan 16;13:RP101701. doi: 10.7554/eLife.101701 (PMC11737871; doi:10.7554/eLife.101701)
Supplement: Supplementary file 28. [file elife-101701-supp28.xlsx]

## Sheet: Sheet1
Name	AUC	T-tests	Log2 FC
4-Guanidinobutanoic acid	1	6.8099e-05	-1.6694
L-Alpha-aminobutyric acid	1	5.8482e-07	-2.0192
L-Erythrulose	1	9.5272e-05	-1.7924
Methylpicraquassioside A	0.96875	9.1131e-05	-0.53119
Inosinic acid	0.96875	0.00023836	1.0895
4-Hydroxyproline	0.95312	0.0021709	0.88603
4-Hydroxybutyric acid	0.95312	0.00061233	1.3389
Uridine	0.95312	0.0018507	-0.97949
Pyroglutamine	0.9375	0.00023464	-0.90518
D-Ribose 5-phosphate	0.9375	0.0012415	-0.38355
Theobromine	0.9375	0.0013485	-0.53551
Uracil	0.9375	0.003313	-0.86969
Cysteinylglycine	0.92188	0.017095	1.3143
L-Phenylalanine	0.92188	0.0024249	0.42162
L-Tyrosine	0.92188	0.0010209	0.57813
Coumarin	0.92188	0.001474	0.52467
Phosphorylcholine	0.92188	0.001915	-0.54336
Indoxyl sulfate	0.92188	0.0020947	-0.94438
L-Valine	0.90625	0.0022182	0.33795
Glycocholic acid	0.90625	0.01712	-3.7562
6-Phosphonoglucono-D-lactone	0.90625	0.0017947	-0.73109
D-Glucose	0.90625	0.0018984	-0.28856
Glycerophosphocholine	0.90625	0.0010887	-0.41248
Acetylcholine	0.90625	0.0033989	0.48901
Proline betaine	0.89062	0.023881	-0.69799
Succinic acid	0.875	0.0086961	0.35184
p-Cresol sulfate	0.875	0.0086479	-1.0727
O-dodecanoylcarnitine	0.84375	0.041922	0.48405
Phosphocreatine	0.84375	0.011311	-0.71815
Mandelic acid	0.84375	0.017092	-0.55218
Pseudouridine	0.84375	0.009598	-0.97322
Hydroxyphenyllactic acid	0.84375	0.0094011	0.63956
Creatine	0.82812	0.030359	0.33807
Creatinine	0.82812	0.062449	-0.20562
L-Alanine	0.82812	0.034975	0.55452
Leucyl-Arginine	0.82812	0.085046	0.35616
L-Lysine	0.82812	0.072258	-0.20604
Guanosine	0.82812	0.034425	-0.60588
Xanthine	0.82812	0.02066	-0.4328
C17-carnitine	0.8125	0.18312	-1.2783
Tetradecanoylcarnitine	0.8125	0.070429	0.39669
Butyrylcarnitine	0.8125	0.028274	0.70713
Propionylcarnitine	0.8125	0.22041	0.19622
Oxypurinol	0.8125	0.029061	-0.38436
1-Methylguanosine	0.8125	0.025468	-1.0307
Adenylsuccinic acid	0.8125	0.026591	1.3828
O-decanoyl-L-carnitine	0.79688	0.22218	0.085401
5-Hydroxy-L-tryptophan	0.79688	0.049543	0.54491
L-Tryptophan	0.79688	0.03913	0.23535
N-a-Acetyl-L-arginine	0.79688	0.038283	0.41819
Guanosine monophosphate	0.79688	0.048751	0.92594
NAD	0.79688	0.030406	-0.57519
Adenosine monophosphate	0.79688	0.026078	0.97599
Guanine	0.79688	0.045113	-0.52335
Cytidine	0.79688	0.023691	-0.42769
Isobutyryl-L-carnitine	0.78125	0.10495	0.27991
L-Hexanoylcarnitine	0.78125	0.072526	0.39515
Pantothenic acid	0.78125	0.065188	-0.19923
Citrulline	0.78125	0.079912	-0.17455
Glutathione	0.78125	0.031055	0.90768
L-Leucine	0.78125	0.016654	0.36378
Lysyl-Leucine	0.78125	0.030322	0.45009
thymine	0.78125	0.052803	0.4079
Leucyl-Serine	0.76562	0.063646	0.8481
L-gamma-glutamyl-L-valine	0.76562	0.12519	0.3092
L-Lactic acid	0.76562	0.062842	0.32553
Hypoxanthine	0.76562	0.049232	-0.20911
cortisol	0.76562	0.72387	-0.97294
2-Hydroxybutyric acid	0.75	0.042321	-0.45167
L-Histidine	0.75	0.13085	0.33559
Serylleucine	0.75	0.085341	0.69206
sn-1 LysoPC(18:2)	0.75	0.067545	-0.41084
Epinephrine	0.75	0.052384	-0.27499
Adenosine 3'-monophosphate	0.75	0.03752	1.3402
(S)-Homostachydrine	0.73438	0.10133	-0.67623
N6-Acetyl-L-lysine	0.73438	0.086709	0.57671
Maltotriose	0.73438	0.14557	-0.48009
sn-1 LysoPC(16:0)	0.73438	0.099074	-0.19958
Cytosine	0.73438	0.06491	-0.19796
Valerylcarnitine	0.71875	0.12866	1.1078
Ornithine	0.71875	0.11892	-0.1201
Phenylalanyl-Tyrosine	0.71875	0.17939	0.58793
Sarcosine	0.71875	0.1761	0.46631
Hippuric acid	0.71875	0.086761	-0.51826
Gluconic acid	0.71875	0.13955	-0.47887
Tridecanoic acid	0.71875	0.14676	0.62068
LysoPE(18:2)	0.71875	0.04829	-0.15982
Phenol sulphate	0.71875	0.161	0.27669
8-Oxo-dGMP	0.71875	0.094578	0.62032
Cytidine monophosphate	0.71875	0.10779	0.6808
Dihydrouracil	0.71875	0.15372	0.50723
3-Hydroxyisovalerylcarnitine	0.70312	0.55689	-0.10476
Symmetric dimethylarginine	0.70312	0.11038	0.3264
Cholic acid	0.70312	0.2432	-1.1808
sn-1 LysoPC(18:0)	0.70312	0.12663	-0.11802
Inosine	0.70312	0.1916	-0.090213
L-Glutamic acid	0.6875	0.14433	-0.11237
Phenylalanyl-Serine	0.6875	0.28016	0.332
Fructose 1,6-bisphosphate	0.6875	0.1746	-0.19643
L-Threonic Acid	0.6875	0.22886	-0.066734
Glycerol 3-phosphate	0.6875	0.27112	-0.128
LysoPE(18:1)	0.6875	0.18421	-0.12465
Allantoin	0.6875	0.26997	-0.10017
Hydroxyvalerylcarnitine	0.67188	0.38641	-0.18695
Isovalerylcarnitine	0.67188	0.26945	0.50763
Homocysteine	0.67188	0.35299	-0.045995
L-Isoleucine	0.67188	0.15013	0.28775
Taurine	0.67188	0.27209	0.30812
2-Hydroxycaproic acid	0.67188	0.13816	0.57937
Xanthosine	0.67188	0.13639	-1.2479
L-Proline	0.65625	0.53919	0.13632
3-Phosphoglyceric acid	0.65625	0.73498	0.12495
LysoPE(20:4)	0.65625	0.26899	-0.098036
2-Hydroxyglutarate	0.65625	0.30286	-0.066052
Riboflavin	0.65625	0.26222	-0.35341
Adenosine	0.65625	0.24795	-0.54229
(S)-2-Azetidinecarboxylic acid	0.64062	0.1751	-0.08654
L-Threonine	0.64062	0.49795	-0.014732
Serylisoleucine	0.64062	0.27667	0.65909
Fumaric acid	0.64062	0.30593	0.31179
L-Kynurenine	0.64062	0.49184	0.44695
1-Methylguanine	0.64062	0.15743	0.6022
Ribothymidine	0.64062	0.88377	-0.092295
Hydroxyhexanoycarnitine	0.625	0.5139	-0.15476
L-Aspartic acid	0.625	0.50979	0.14615
L-gamma-glutamyl-L-isoleucine	0.625	0.56062	-0.043843
Phenylalanyl-Valine	0.625	0.40472	0.49623
2-Hydroxy-2-methylbutyric acid	0.625	0.31683	0.2686
Deoxyadenosine	0.625	0.38716	-0.47256
ADP	0.625	0.37857	-0.088946
adenine	0.625	0.30199	-0.097434
Choline	0.625	0.74842	0.093151
Histidinyl-Phenylalanine	0.60938	0.65359	0.09574
L-Arginine	0.60938	0.48659	0.13653
D-Maltose	0.60938	0.72724	-0.88795
Uridine 5'-monophosphate	0.60938	0.3656	0.31576
Diethanolamine	0.59375	0.63954	0.14521
L-Methionine	0.59375	0.63807	0.80369
N-Acetyl-L-aspartic acid	0.59375	0.58005	-0.20799
Serylvaline	0.59375	0.33263	0.43272
Urocanic acid	0.59375	0.24443	0.53785
Alpha-ketoisovaleric acid	0.59375	0.53159	-0.0061162
Phosphoenolpyruvic acid	0.59375	0.64746	-0.080743
Tiglylcarnitine	0.57812	0.30485	-0.18499
Pipecolic acid	0.57812	0.51123	-0.16836
L-Malic acid	0.57812	0.67902	0.10156
1-Methyladenosine	0.57812	0.61464	0.16693
Methionyl-Phenylalanine	0.5625	0.59653	0.15522
Phenylalanyl-Glutamate	0.5625	0.82948	0.10187
Tyrosyl-Alanine	0.5625	0.44732	-0.2069
Urea	0.5625	0.81773	0.058741
6-Phosphogluconic acid	0.5625	0.52967	0.16067
Ketoleucine	0.5625	0.63055	-0.010303
Allopurinol	0.5625	0.42101	-0.08567
L-Carnitine	0.5625	0.77153	0.030491
L-Acetylcarnitine	0.54688	0.91097	0.040234
Gamma-Glutamyltyrosine	0.54688	0.84259	-0.0064156
Oxidized glutathione	0.54688	0.48205	0.16059
Pyroglutamic acid	0.54688	0.59542	0.12362
D-Glyceraldehyde 3-phosphate	0.54688	0.71144	0.11887
D-Sedoheptulose 7-phosphate	0.54688	0.98588	-0.13343
Citric acid	0.54688	0.68682	0.16061
2-Ethylhydracrylic acid	0.54688	0.93249	0.063339
Acetaminophen	0.54688	0.41295	0.22291
2-Hydroxypyridine	0.54688	0.94895	0.05911
L-Octanoylcarnitine	0.53125	0.66166	0.11419
Isoleucyl-Alanine	0.53125	0.36562	0.16995
L-Glutamine	0.53125	0.96577	0.057601
N-acetyltryptophan	0.53125	0.90409	-0.13883
Threoninyl-Leucine	0.53125	0.69209	0.19866
Glucose 6-phosphate	0.53125	0.97904	0.083758
cis-Aconitic acid	0.53125	0.68966	0.1762
LysoPC(20:4(5Z,8Z,11Z,14Z))	0.53125	0.31349	-0.065947
Indolelactic acid	0.53125	0.62893	-0.11352
5'-Methylthioadenosine	0.53125	0.57078	0.35685
4-Pyridoxic acid	0.53125	0.74261	0.098723
Niacinamide	0.53125	0.68014	0.018907
Betaine	0.51562	0.77857	0.03019
L-gamma-glutamyl-L-leucine	0.51562	0.83207	0.10992
N-Acetyl-L-methionine	0.51562	0.76438	0.034162
S-Lactoylglutathione	0.51562	0.90176	0.31167
D-Erythrose 4-phosphate	0.51562	0.95371	-0.034608
Isocitric acid	0.51562	0.77958	0.037903
Uric acid	0.51562	0.97961	0.046108
