# Supplementary material for: Exploration of the metabolomic mechanisms of postmenopausal hypertension induced by low estrogen state
Source: eLife. 2025 Jan 16;13:RP101701. doi: 10.7554/eLife.101701 (PMC11737871; doi:10.7554/eLife.101701)
Supplement: Supplementary file 29. [file elife-101701-supp29.xlsx]

## Sheet: Sheet1
Pathway Name	Match Status	p	-log(p)	Holm p	FDR	Impact
Phenylalanine, tyrosine and tryptophan biosynthesis	2/4	0.00023563	3.6278	0.019321	0.0065975	1
Phenylalanine metabolism	2/12	0.0025194	2.5987	0.20155	0.042326	0.35714
Tyrosine metabolism	2/42	0.029547	1.5295	1	0.39289	0.16435
Citrate cycle (TCA cycle)	1/20	0.12526	0.90219	1	0.85666	0.02981
Steroid hormone biosynthesis	1/77	0.40866	0.38864	1	1	0.02188
Glycerophospholipid metabolism	1/36	0.21509	0.66737	1	1	0.01736
Alanine, aspartate and glutamate metabolism	1/28	0.17127	0.76631	1	0.95912	0.0024
Aminoacyl-tRNA biosynthesis	5/48	5.9054e-06	5.2288	0.00049605	0.00048526	0
Valine, leucine and isoleucine biosynthesis	3/8	1.1554e-05	4.9373	0.00095897	0.00048526	0
Valine, leucine and isoleucine degradation	3/40	0.0018217	2.7395	0.14756	0.038255	0
Synthesis and degradation of ketone bodies	1/5	0.032741	1.4849	1	0.39289	0
Ubiquinone and other terpenoid-quinone biosynthesis	1/9	0.058236	1.2348	1	0.61148	0
Arginine biosynthesis	1/14	0.089253	1.0494	1	0.8009	0
Butanoate metabolism	1/15	0.095345	1.0207	1	0.8009	0
Pantothenate and CoA biosynthesis	1/19	0.11935	0.92319	1	0.85666	0
Pyruvate metabolism	1/22	0.13697	0.86337	1	0.85666	0
Propanoate metabolism	1/23	0.14278	0.84535	1	0.85666	0

## Sheet: Sheet2
Pathway Name	Match Status	p	-log(p)	Holm p	FDR	Impact
Pentose phosphate pathway	2/21	0.015183	1.8186	1	1	0.21042
Glycerophospholipid metabolism	2/36	0.04207	1.376	1	1	0.05751
Arginine and proline metabolism	2/38	0.046451	1.333	1	1	0.06099
Pyrimidine metabolism	2/39	0.048704	1.3124	1	1	0.09014
Caffeine metabolism	1/12	0.10619	0.97391	1	1	0
Purine metabolism	2/66	0.1223	0.91256	1	1	0.13864
Pantothenate and CoA biosynthesis	1/19	0.1632	0.78728	1	1	0
Citrate cycle (TCA cycle)	1/20	0.17106	0.76685	1	1	0
Ether lipid metabolism	1/20	0.17106	0.76685	1	1	0
beta-Alanine metabolism	1/21	0.17886	0.7475	1	1	0
Pyruvate metabolism	1/22	0.18658	0.72913	1	1	0
Glycolysis / Gluconeogenesis	1/26	0.21681	0.66391	1	1	0.1055
Cysteine and methionine metabolism	1/33	0.26723	0.57312	1	1	0.04179
Glycine, serine and threonine metabolism	1/34	0.27418	0.56197	1	1	0.04655
Primary bile acid biosynthesis	1/46	0.35294	0.4523	1	1	0
1
